# Supplementary material for: Associations of Vitamin B12 and Methylmalonic Acid Levels with Mortality Risk in Patients with Preexisting Stroke: A Prospective Cohort Study
Source: Research Square preprint supplement (doi:10.21203/rs.3.rs-6116913/v1), 2025-03-11
Supplement: Supplementary file 1 [file f352e15b62ad3f7e20b9aa40.docx]

Table S1. Diagnostic criteria of covariates in NHANES

| **Variable** | **Diagnostic criteria** |
| --- | --- |
| Age | Age in years of the participant at the time of screening. This variable is divided into four groups: people aged 40 and under, people aged 40 to 60, people aged 60 to 80, and people aged over 80. |
| Gender | Gender of the participant. This variable was subdivided into two groups: female and male |
| Race | Recode of reported race and Hispanic origin information. This variable was subdivided into five groups: Mexican American, Other Hispanic, non-Hispanic White, non-Hispanic Black and other Race |
| Marital status: | This variable was subdivided into three groups: Married/Living with partnered, Widowed/Divorced/Separated, Never married. |
| Poverty to income ratio (PIR) | A ratio of family income to poverty threshold. This variable was subdivided into four groups: Less than 1, 1 to 1.99, 2 to 3.99, 4 or greater. |
| Education level | Response of “what is the highest grade or level of school [1] completed or the highest degree {you have/s/he has} received?” This variable was subdivided into three groups: Less than high school, high school or equivalent, and colleges or above. |
| Body mass index (BMI) | kg/m2. This variable was subdivided into three groups: those with a BMI less than 25, those with a BMI between 25 and 30, and those with a BMI greater than or equal to 30. |
| Smoke status: | This variable was subdivided into three groups: former smoker, non-smoker, current smoker. Former smoker, defined as someone who has smoked at least 100 cigarettes and has quit for more than three months |
| Alcohol consumption: | Participants were classified as being a nondrinker, low to moderate drinker, or heavy drinker according to the self-reported average number of alcoholic drinks consumed per day. A moderate drinker was defined as having fewer than 2 drinks per day for men and fewer than 1 drink per day for women; a heavy drinker was defined as 2 or more drinks per day for men and 1 or more drinks per day for women. |
| Diabetes mellitus: | The diagnostic criteria for diabetes are: the doctor told you have diabetes or glycohemoglobin HbA1c (%) greater than 6.5 or use of diabetes medication or insulin. This variable was subdivided into two groups: yes and no [2]. |
| Hypertension | The diagnostic criteria for hypertension are [2]: the doctor told you have hypertension or use of medication for hypertension or systolic more than 140 or diastolic more than 90. Average blood pressure was calculated by the following protocol: The diastolic reading with zero is not used to calculate the diastolic average; If all diastolic readings were zero, then the average would be zero; If only one blood pressure reading was obtained, that reading is the average; If there is more than one blood pressure reading, the first reading is always excluded from the average. This variable was subdivided into two groups: yes and no. |
| Hyperlipidemia | Hyperlipidemia refers to an elevation of triglycerides or cholesterol in the blood, or the use of lipid-lowering drugs. Hypertriglyceridemia is defined as triglycerides levels greater than or equal to 1.7 mmol/L, while hypercholesterolemia is defined as total cholesterol levels greater than or equal to 5.2 mmol/L, or low-density lipoprotein levels greater than or equal to 3.37mmol/L. This variable was subdivided into two groups: yes and no. |
| Coronary heart disease/ congestive heart failure/cancer | Response to “Has a doctor or other health professional ever told {you/SP} that {you/s/he} . . .had coronary heart disease/ congestive heart failure/ cancer or malignancy?” These variables were subdivided into two groups: yes and no. |
| Chronic obstructive pulmonary disease (COPD) | COPD including chronic bronchitis and/or emphysema were defined according to the self-reported diagnosis. This variable was subdivided into two groups: yes and no. |
| Chronic Kidney Disease (CKD) | CKD is defined as an eGFR of less than 60 mL/min/1.73 m². Renal function was calculated as an estimated glomerular filtration rate (eGFR) with the formula developed by the Chronic Kidney Disease Epidemiology Collaboration (CKD-EPI). This variable was subdivided into two groups: yes and no. |

Table S2. Underlying cause of death according to NCHS definitions

| **Cause of Death (UCOD_LEADING)** | **Number of Deaths** | **Percentage (weighted%)** |
| --- | --- | --- |
| 1. Diseases of heart (I00-I09, I11, I13, I20-I51) | 160 | 32.9 |
| 2. Malignant neoplasms (C00-C97) | 64 | 14.8 |
| 3. Chronic lower respiratory diseases (J40-J47) | 25 | 4.8 |
| 4. Accidents (unintentional injuries) (V01-X59, Y85-Y86) | 11 | 3.4 |
| 5. Cerebrovascular diseases (I60-I69) | 47 | 8.6 |
| 6. Alzheimer’s disease (G30) | 15 | 3.8 |
| 7. Diabetes mellitus (E10-E14) | 24 | 4.8 |
| 8. Influenza and pneumonia (J09-J18) | 7 | 1.0 |
| 9. Nephritis, nephrotic syndrome and nephrosis (N00-N07, N17-N19, N25-N27) | 12 | 1.9 |
| 10. All other causes (residual): Ineligible, under age 18, assumed alive, or no cause of death data available | 115 | 23.9 |
| Total | 480 | 100 |

The underlying causes of death were defined according to NCHS definitions. This study summarizes the underlying causes of death as recorded in the NHANES-linked National Death Index public-access files up to December 31, 2019. The variables were adjusted for NHANES survey weights. The observed numbers for categorical variables were unweighted, while the percentages were weighted (weighted%). NCHS = National center for health statistics.

Table S3. Baseline Characteristics of Participants With stoke by Serum Vitamin B12 evels in NHANES

| **Characteristic** | **Serum vitamin B12 levels, pmol/L** | | | | **Pvalue** |
| --- | --- | --- | --- | --- | --- |
| **Q1 <=278 (n=206)** | **Q2 278-378 (n=205)** | **Q3 378-531 (n=205)** | **Q4 >531 (n=204)** |
| Male (%) | 104 (38.2) | 108 (51.5) | 104 (44.2) | 84(34.2) | 0.067 |
| Age, years | 64.34 (17.13) | 63.09 (15.28) | 64.77 (13.64) | 68.15 (12.50) | **0.026** |
| Age Distribution (%) | - | - | - | - | **0.007** |
| <=40 | 10 (10.7) | 15 (12.3) | 3 (2.9) | 4 (2.9) | - |
| 40-60 | 34 (21.8) | 48 (28.7) | 52 (33.9) | 42 (22.0) | - |
| 60-80 | 123 (54.2) | 112 (49.9) | 130 (55.6) | 138 (68.1) | - |
| >=80 | 39 (13.3) | 30 (9.1) | 20 (7.5) | 20 (7.0) | - |
| Race/Ethnicity (%) |  |  |  |  | 0.216 |
| Mexican | 28 (3.7) | 33 (5.9) | 29 (4.5) | 19 (2.8) |  |
| Non-hispanic black | 32 (7.4) | 43 (11.3) | 57 (15.4) | 60 (15.2) |  |
| Non-hispanic white | 129 (80.9) | 117 (75.4) | 99 (69.5) | 98 (69.9) |  |
| Other | 7 (3.7) | 5 (4.7) | 8 (7.4) | 10 (9.1) |  |
| Other Hispanic | 10 (4.2) | 7 (2.7) | 12 (3.2) | 17 (3.0) |  |
| Marital Status (%) |  |  |  |  | 0.251 |
| Married/Living with partner | 107 (54.3) | 103 (53.9) | 109 (58.6) | 82 (50.2) |  |
| Never married | 9 (5.6) | 18 (8.6) | 18 (11.8) | 13 (6.1) |  |
| Widowed/Divorced/Separated | 87 (40.2) | 79 (37.5) | 72 (29.7) | 104 (43.7) |  |
| Education level (%) |  |  |  |  | **0.001** |
| College or above | 68 (42.3) | 58 (30.6) | 64 (30.9) | 90 (54.8) |  |
| High school or equivalent | 39 (20.4) | 51 (29.4) | 57 (35.0) | 46 (23.1) |  |
| Less than high school | 99 (37.3) | 96 (40.0) | 84 (34.1) | 68 (22.1) |  |
| Poverty to income ratio (%) |  |  |  |  | 0.160 |
| <1 | 54 (22.9) | 48 (24.3) | 38 (19.4) | 40 (16.2) |  |
| 1-1.99 | 76 (37.9) | 72 (34.6) | 63 (31.3) | 66 (27.0) |  |
| 2-3.99 | 42 (23.8) | 50 (27.8) | 50 (34.5) | 49 (29.9) |  |
| >=4 | 23 (15.5) | 19 (13.3) | 25 (14.9) | 36 (26.9) |  |
| Smoking Status (%) |  |  |  |  | 0.100 |
| Former-smoker | 76 (34.3) | 73 (29.0) | 71 (31.5) | 81 (41.8) |  |
| Non-smoker | 88 (43.5) | 77 (36.9) | 88 (41.7) | 87 (41.4) |  |
| Now-smoker | 42 (22.2) | 55 (34.1) | 44 (26.8) | 36 (16.8) |  |
| Alcohol consumption (%) |  |  |  |  | 0.894 |
| Heavy drinker | 56 (31.8) | 56 (30.2) | 71 (37.1) | 59 (31.9) |  |
| Low to moderate drinker | 19 (8.1) | 19 (9.4) | 16 (8.7) | 17 (10.4) |  |
| Non drinker | 131 (60.1) | 130 (60.4) | 118 (54.3) | 128 (57.7) |  |
| BMI, kg/m2 | 29.99 (5.52) | 28.99 (6.92) | 29.92 (7.66) | 28.09 (6.65) | 0.189 |
| BMI Distribution (%) |  |  |  |  | **0.024** |
| <=25 | 40 (14.8) | 50 (29.3) | 47 (26.1) | 64 (36.4) |  |
| 25-30 | 78 (37.4) | 73 (35.5) | 60 (30.9) | 60 (32.3) |  |
| >=30 | 71 (47.8) | 68 (35.2) | 88 (43.0) | 55 (31.4) |  |
| Hypertension (%) | 165 (76.7) | 153 (72.3) | 167 (79.2) | 172 (80.8) | 0.468 |
| Hyperlipidemia (%) | 153 (76.0) | 155 (79.2) | 152 (74.9) | 141 (71.0) | 0.487 |
| Diabetes mellitus (%) | 65 (29.9) | 63 (27.6) | 71 (29.3) | 84 (36.1) | 0.570 |
| Chronic Kidney Disease (%) | 73 (33.9) | 75 (36.2) | 72 (29.3) | 87 (41.8) | 0.159 |
| Heart Failure (%) | 41 (21.2) | 28 (12.6) | 31 (15.2) | 47 (21.7) | 0.263 |
| Coronary Heart Disease (%) | 38 (18.7) | 32 (17.4) | 28 (16.9) | 50 (23.4) | 0.630 |
| Cancer (%) | 49 (24.1) | 36 (17.7) | 30 (14.0) | 41 (23.0) | 0.164 |
| Chronic obstructive pulmonary disease (%) | 31 (16.7) | 35 (21.7) | 24 (14.7) | 28 (15.7) | 0.585 |
| Serum folate, nmol/L | 26.30 [18.85, 39.53] | 32.63 [21.66, 52.15] | 42.51 [27.90, 66.60] | 60.41 [39.19, 90.65] | **<0.001** |
| Homocysteine, μmol/L | 12.14 [8.87, 14.80] | 10.65 [8.39, 12.18] | 9.19 [7.43, 11.35] | 8.13 [6.69, 10.49] | **<0.001** |
| Circulating MMA, nmol/L | 230.00 [150.00, 340.00] | 186.09 [135.73, 290.11] | 162.00 [117.09, 220.00] | 155.53 [116.47, 225.32] | **<0.001** |
| B12 intake from foods, μg/day | 3.21 [1.73, 5.87] | 3.72 [2.13, 6.24] | 3.83 [1.98, 6.17] | 3.66 [1.84, 6.14] | 0.096 |
| Metformin use, % | 24 (10.7) | 23 (9.7) | 17 (6.8) | 21 (7.3) | 0.616 |
| Anti-platelet agents, % | 14 (6.1) | 16 (5.6) | 8 (4.3) | 6 (4.7) | 0.923 |
| Anti-lipid agents, % | 74 (33.0) | 66 (35.1) | 66 (31.4) | 93 (51.4) | **0.008** |
| Histamine-2 receptor antagonist, % | 37 (14.1) | 29 (14.7) | 25 (13.4) | 36 (17.5) | 0.790 |
| B12 supplements (%) | 11 (7.4) | 17 (10.6) | 36 (26.7) | 77 (50.9) | **<0.001** |
| eGFR, (mL/min/1.73 m2) | 76.51 [56.97, 97.49] | 71.05 [54.03, 93.86] | 76.09 [58.80, 92.71] | 70.68 [47.06, 88.08] | **0.020** |

Continuous variables are presented as mean (SD), median [IQR]. Categorical variables were adjusted for survey weights of NHANES. The observed numbers for categorical variables were unweighted. Bold text indicates a statistically significant difference with a p-value less than 0.05. NHANES = National Health and Nutrition Examination Survey; BMI = body mass index; MMA = methylmalonic acid; eGFR = estimated glomerular filtration rate.

Table S4. Baseline Characteristics of Participants With stoke by Circulating MMA levels in NHANES

| **Characteristic** | **Circulating MMA levels** | | | | **P value** |
| --- | --- | --- | --- | --- | --- |
| **Q1 <=130 (n=221)** | **Q2 130-180 (n=196)** | **Q3 180-268 (n=198)** | **Q4 >268 (n=205)** |
| Male (%) | 104 (38.6) | 94 (41.2) | 114 (52.5) | 98 (37.6) | **0.046** |
| Age, years | 58.54 (14.95) | 63.85 (15.26) | 69.42 (12.64) | 69.62 (13.22) | **<0.001** |
| Age Distribution (%) |  |  |  |  | **<0.001** |
| <=40 | 16 (12.3) | 9 (8.5) | 3 (2.9) | 4 (4.4) |  |
| 40-60 | 75 (39.7) | 44 (26.7) | 31 (20.0) | 26 (17.6) |  |
| 60-80 | 120 (44.9) | 119 (57.8) | 132 (62.1) | 132 (64.9) |  |
| >=80 | 10 (3.1) | 24 (7.0) | 32 (15.0) | 43 (13.1) |  |
| Race/Ethnicity (%) |  |  |  |  | **0.004** |
| Mexican | 41 (6.8) | 29 (4.6) | 21 (3.2) | 18 (2.1) |  |
| Non-hispanic black | 68 (16.9) | 50 (13.6) | 40 (10.2) | 34 (7.9) |  |
| Non-hispanic white | 85 (62.6) | 96 (72.1) | 123 (80.3) | 139 (82.7) |  |
| Other | 20 (11.1) | 9 (4.4) | 8 (4.4) | 9 (3.9) |  |
| Other Hispanic | 7 (2.6) | 12 (5.3) | 6 (2.0) | 5 (3.3) |  |
| Marital Status (%) |  |  |  |  | **0.003** |
| Married/Living with partner | 118 (62.1) | 100 (52.6) | 97 (52.4) | 86 (48.4) |  |
| Never married | 18 (7.3) | 23 (15.0) | 11 (7.3) | 6 (3.0) |  |
| Widowed/Divorced/Separated | 76 (30.6) | 72 (32.4) | 87 (40.2) | 107 (48.6) |  |
| Education level (%) |  |  |  |  | 0.112 |
| College or above | 84 (48.3) | 66 (38.0) | 67 (36.2) | 63 (34.1) |  |
| High school or equivalent | 57 (27.8) | 43 (25.3) | 50 (28.6) | 43 (26.1) |  |
| Less than high school | 80 (23.8) | 87 (36.6) | 81 (35.2) | 99 (39.8) |  |
| Poverty to income ratio (%) |  |  |  |  | 0.060 |
| <1 | 49 (21.7) | 43 (17.5) | 44 (20.3) | 44 (23.0) |  |
| 1-1.99 | 63 (27.1) | 59 (28.8) | 70 (32.6) | 85 (42.5) |  |
| 2-3.99 | 52 (26.7) | 48 (32.0) | 47 (33.4) | 44 (24.3) |  |
| >=4 | 35 (24.5) | 31 (21.7) | 20 (13.7) | 17 (10.1) |  |
| Smoking Status (%) |  |  |  |  | **0.045** |
| Former-smoker | 74 (30.2) | 71 (33.9) | 72 (35.4) | 84 (37.7) |  |
| Non-smoker | 89 (39.5) | 75 (35.6) | 90 (48.9) | 86 (39.9) |  |
| Now-smoker | 58 (30.4) | 50 (30.5) | 35 (15.7) | 34 (22.5) |  |
| Alcohol consumption (%) |  |  |  |  | 0.146 |
| Heavy drinker | 81 (38.3) | 62 (38.5) | 52 (24.9) | 47 (28.2) |  |
| Low to moderate drinker | 16 (7.5) | 18 (8.3) | 15 (9.7) | 22 (11.3) |  |
| Non drinker | 124 (54.3) | 126 (53.1) | 131 (65.4) | 136 (60.5) |  |
| BMI, kg/m2 | 30.35 (7.18) | 28.55 (6.37) | 29.39 (5.41) | 28.52 (7.52) | 0.234 |
| BMI Distribution (%) |  |  |  |  | 0.406 |
| <=25 | 50 (25.1) | 49 (28.1) | 48 (22.4) | 54 (30.7) |  |
| 25-30 | 70 (29.5) | 67 (37.5) | 65 (34.1) | 69 (36.0) |  |
| >=30 | 91 (45.4) | 71 (34.3) | 61 (43.5) | 59 (33.3) |  |
| Hypertension (%) | 169 (70.8) | 155 (77.9) | 158 (77.9) | 175 (83.2) | 0.172 |
| Hyperlipidemia (%) | 167 (78.1) | 141 (72.9) | 146 (75.0) | 147 (74.6) | 0.712 |
| Diabetes mellitus (%) | 68 (25.8) | 62 (25.4) | 69 (34.4) | 84 (37.8) | 0.102 |
| Chronic Kidney Disease (%) | 26 (12.0) | 57 (25.6) | 94 (44.0) | 130 (62.6) | **<0.001** |
| Heart Failure (%) | 26 (14.1) | 25 (14.0) | 43 (17.3) | 53 (25.1) | 0.085 |
| Coronary Heart Disease (%) | 29 (11.6) | 35 (19.3) | 47 (25.6) | 37 (21.4) | 0.055 |
| Cancer (%) | 37 (19.8) | 29 (13.5) | 44 (20.7) | 46 (24.3) | 0.221 |
| Chronic obstructive pulmonary disease (%) | 23 (12.5) | 32 (19.7) | 30 (19.3) | 33 (18.4) | 0.413 |
| Serum folate, nmol/L | 36.20 [23.30, 56.40] | 41.02 [24.12, 65.50] | 37.80 [27.92, 62.90] | 37.10 [22.00, 69.21] | 0.633 |
| Serum vitamin B12, pmol/L | 449.05 [313.94, 648.02] | 392.14 [302.11, 591.91] | 361.22 [260.21, 456.50] | 320.11 [241.68, 469.48] | **<0.001** |
| Homocysteine, μmol/L | 8.40 [7.07, 10.51] | 9.64 [8.01, 12.20] | 10.20 [8.40, 12.45] | 13.35 [11.06, 16.59] | **<0.001** |
| B12 intake from foods, μg/day | 3.40 [1.79, 5.89] | 3.72 [1.91, 5.98] | 3.70 [2.01, 6.60] | 3.26 [1.87, 5.29] | 0.192 |
| Metformin use, % | 26 (7.6) | 18 (7.9) | 25 (12.9) | 16 (6.6) | 0.290 |
| Anti-platelet agents, % | 14 (6.6) | 7 (4.2) | 9 (3.4) | 14 (6.1) | 0.535 |
| Anti-lipid agents, % | 82 (37.8) | 69 (39.2) | 77 (35.6) | 71 (38.1) | 0.956 |
| Histamine-2 receptor antagonist, % | 30 (12.6) | 24 (12.8) | 37 (18.4) | 36 (16.2) | 0.535 |
| B12 supplements (%) | 50 (32.9) | 34 (22.8) | 24 (21.1) | 31 (22.2) | 0.250 |
| eGFR, (mL/min/1.73 m2) | 89.26 [76.74, 103.14] | 77.36 [60.92, 94.64] | 64.20 [50.94, 79.11] | 51.33 [37.67, 76.24] | **<0.001** |

Continuous variables are presented as mean (SD), median [IQR]. Categorical variables were adjusted for survey weights of NHANES. The observed numbers for categorical variables were unweighted. Bold text indicates a statistically significant difference with a p-value less than 0.05. NHANES = National Health and Nutrition Examination Survey; BMI = body mass index; MMA = methylmalonic acid; eGFR = estimated glomerular filtration rate.

Table S5. Baseline characteristics in patients with stroke with or without B12 supplement use in NHANES

| **Characteristic** | **Vitamin B12 supplements** | | **P value** |
| --- | --- | --- | --- |
| **Non-Use (n=511)** | **Use (n=141)** |
| Male (%) | 255 (41.5) | 60 (41.0) | 0.933 |
| Age, years | 65.05 (14.46) | 67.27 (12.75) | 0.211 |
| Age Distribution (%) |  |  | **0.009** |
| <=40 | 15 (5.8) | 4 (4.1) |  |
| 40-60 | 115 (30.0) | 30 (18.9) |  |
| 60-80 | 317 (55.8) | 101 (74.6) |  |
| >=80 | 64 (8.4) | 6 (2.4) |  |
| Race/Ethnicity (%) |  |  | 0.223 |
| Mexican | 62 (4.5) | 111 (2.5) |  |
| Non-hispanic black | 116 (11.6) | 29 (8.0) |  |
| Non-hispanic white | 285 (76.1) | 85 (79.1) |  |
| Other | 29 (5.2) | 12 (9.1) |  |
| Other Hispanic | 19 (2.5) | 4 (1.3) |  |
| Marital Status (%) |  |  | 0.121 |
| Married/Living with partner | 243 (50.8) | 74 (62.1) |  |
| Never married | 36 (7.4) | 11 (8.4) |  |
| Widowed/Divorced/Separated | 223 (41.8) | 56 (29.5) |  |
| Education level (%) |  |  | **0.021** |
| College or above | 183 (38.6) | 65 (54.6) |  |
| High school or equivalent | 123 (28.2) | 36 (25.0) |  |
| Less than high school | 205 (33.2) | 40 (20.4) |  |
| Poverty to income ratio (%) |  |  | 0.083 |
| <1 | 121 (23.3) | 18 (12.1) |  |
| 1-1.99 | 163 (29.6) | 49 (30.3) |  |
| 2-3.99 | 126 (31.0) | 33 (30.5) |  |
| >=4 | 59 (16.0) | 29 (27.2) |  |
| Smoking Status (%) |  |  | 0.141 |
| Former-smoker | 192 (34.1) | 57 (43.7) |  |
| Non-smoker | 208 (39.6) | 58 (39.5) |  |
| Now-smoker | 111 (26.3) | 26 (16.9) |  |
| Alcohol consumption (%) |  |  | 0.311 |
| Heavy drinker | 158 (35.8) | 46 (32.0) |  |
| Low to moderate drinker | 42 (7.6) | 12 (13.0) |  |
| Non drinker | 311 (56.6) | 52 (54.9) |  |
| BMI, kg/m2 | 29.51 (6.55) | 28.22 (7.71) | 0.228 |
| BMI Distribution (%) |  |  | 0.063 |
| <=25 | 123 (24.3) | 48 (38.6) |  |
| 25-30 | 173 (35.7) | 41 (30.2) |  |
| >=30 | 179 (40.1) | 42 (31.3) |  |
| Hypertension (%) | 412 (78.0) | 110 (75.2) | 0.677 |
| Hyperlipidemia (%) | 388 (77.4) | 92 (70.1) | 0.214 |
| Diabetes mellitus (%) | 167 (29.2) | 54 (36.7) | 0.170 |
| Chronic Kidney Disease (%) | 195 (36.2) | 50 (34.3) | 0.709 |
| Heart Failure (%) | 88 (17.0) | 24 (16.3) | 0.851 |
| Coronary Heart Disease (%) | 98 (20.9) | 26 (17.3) | 0.458 |
| Cancer (%) | 105 (21.5) | 37 (25.1) | 0.565 |
| Chronic obstructive pulmonary disease (%) | 86 (20.8) | 18 (13.4) | 0.210 |
| Serum folate, nmol/L | 38.17 [24.50, 56.14] | 73.08 [41.91, 105.86] | **<0.001** |
| Serum vitamin B12, pmol/L | 344.53 [270.22, 476.64] | 596.03 [432.75, 771.65] | **<0.001** |
| Homocysteine, μmol/L | 9.76 [7.80, 12.21] | 7.73 [6.34, 10.18] | 0.219 |
| Circulating MMA, nmol/L | 180.00 [130.00, 267.22] | 159.46 [120.36, 229.62] | 0.072 |
| B12 intake from foods, μg/day | 3.53 [1.95, 6.15] | 3.52 [1.83, 5.82] | 0.805 |
| Metformin use, % | 52 (8.2) | 15 (11.4) | 0.299 |
| Anti-platelet agents, % | 32 (5.2) | 5 (5.7) | 0.881 |
| Anti-lipid agents, % | 187 (37.6) | 65 (49.4) | 0.077 |
| Histamine-2 receptor antagonist, % | 88 (17.0) | 23 (14.7) | 0.64 |
| eGFR, (mL/min/1.73 m2) | 73.93 [54.04, 94.16] | 72.48 [55.60, 88.06] | 0.410 |

Continuous variables are presented as mean (SD), median [IQR]. Categorical variables were adjusted for survey weights of NHANES. The observed numbers for categorical variables were unweighted. Bold text indicates a statistically significant difference with a p-value less than 0.05. NHANES = National Health and Nutrition Examination Survey; BMI = body mass index; MMA = methylmalonic acid; eGFR = estimated glomerular filtration rate.

Table S6. Baseline characteristics across the quartiles of B12 intake from foods in patients with stroke in NHANES

| **Characteristic** | **Vitamin B12 intake from foods (μg/d)** | | | | **Pvalue** |
| --- | --- | --- | --- | --- | --- |
| **Q1 <=1.81 (n=183)** | **Q2 1.81-3.24 (n=188)** | **Q3 3.24-5.79 (n=192)** | **Q4 >5.79 (n=195)** |
| Male (%) | 66 (24.9) | 88 (41.8) | 109 (45.5) | 115 (54.7) | **<0.001** |
| Age, years | 67.07 (12.53) | 63.71 (16.42) | 64.78 (15.40) | 63.54 (14.85) | 0.202 |
| Age Distribution (%) |  |  |  |  | 0.650 |
| <=40 | 4 (3.1) | 9 (9.8) | 7 (7.9) | 11 (8.8) |  |
| 40-60 | 33 (23.3) | 41 (27.4) | 45 (28.6) | 48 (28.9) |  |
| 60-80 | 122 (62.5) | 113 (53.5) | 110 (53.9) | 112 (55.2) |  |
| >=80 | 24 (11.0) | 25 (9.3) | 30 (9.6) | 24 (7.0) |  |
| Race/Ethnicity (%) |  |  |  |  | 0.272 |
| Mexican | 23 (2.6) | 30 (5.0) | 32 (5.4) | 16 (3.8) |  |
| Non-hispanic black | 64 (18.8) | 34 (9.8) | 38 (11.2) | 39 (9.4) |  |
| Non-hispanic white | 78 (69.0) | 105 (76.0) | 111 (75.6) | 121 (77.5) |  |
| Other | 11 (7.1) | 11 (5.0) | 7 (6.1) | 10 (4.7) |  |
| Other Hispanic | 7 (2.5) | 8 (4.3) | 4 (1.8) | 9 (4.7) |  |
| Marital Status (%) |  |  |  |  | **0.031** |
| Married/Living with partner | 76 (45.4) | 97 (56.8) | 106 (64.8) | 100 (54.2) |  |
| Never married | 13 (5.9) | 10 (8.8) | 7 (2.8) | 15 (9.2) |  |
| Widowed/Divorced/Separated | 93 (48.6) | 76 (34.5) | 71 (32.4) | 76 (36.6) |  |
| Education level (%) |  |  |  |  | 0.677 |
| College or above | 54 (39.7) | 60 (36.2) | 76 (43.7) | 72 (39.7) |  |
| High school or equivalent | 44 (31.4) | 46 (30.4) | 37 (21.2) | 52 (27.7) |  |
| Less than high school | 85 (28.9) | 82 (33.4) | 79 (35.1) | 71 (32.6) |  |
| Poverty to income ratio (%) |  |  |  |  | 0.810 |
| <1 | 45 (23.0) | 36 (18.5) | 46 (24.9) | 37 (16.3) |  |
| 1-1.99 | 60 (33.1) | 75 (36.0) | 64 (31.6) | 61 (30.3) |  |
| 2-3.99 | 43 (29.0) | 44 (27.7) | 343 (27.5) | 49 (32.6) |  |
| >=4 | 23 (14.9) | 23 (17.8) | 20 (16.0) | 30 (20.8) |  |
| Smoking Status (%) |  |  |  |  | 0.888 |
| Former-smoker | 64 (33.6) | 66 (32.5) | 72 (37.7) | 78 (34.7) |  |
| Non-smoker | 81 (43.5) | 81 (43.7) | 77 (37.8) | 71 (36.9) |  |
| Now-smoker | 38 (22.9) | 41 (23.8) | 42 (24.4) | 45 (28.4) |  |
| Alcohol consumption (%) |  |  |  |  | 0.326 |
| Heavy drinker | 56 (33.7) | 64 (36.7) | 56 (32.9) | 58 (33.5) |  |
| Low to moderate drinker | 12 (4.7) | 17 (11.5) | 14 (7.2) | 25 (13.9) |  |
| Non drinker | 115 (61.6) | 107 (51.8) | 122 (60.0) | 112 (52.6) |  |
| BMI, kg/m2 | 28.97 (5.72) | 28.39 (6.93) | 29.94 (7.57) | 29.66 (6.80) | 0.436 |
| BMI Distribution (%) |  |  |  |  | 0.497 |
| <=25 | 37 (24.3) | 58 (35.6) | 41 (24.7) | 50 (23.5) |  |
| 25-30 | 73 (38.5) | 55 (28.1) | 67 (35.9) | 59 (33.5) |  |
| >=30 | 61 (37.2) | 63 (36.2) | 70 (39.4) | 68 (43.1) |  |
| Hypertension (%) | 156 (85.5) | 144 (69.0) | 152 (75.7) | 155 (77.2) | 0.102 |
| Hyperlipidemia (%) | 128 (75.0) | 132 (66.7) | 152 (83.9) | 141 (75.6) | **0.016** |
| Diabetes mellitus (%) | 72 (37.1) | 63 (26.5) | 73 (31.4) | 58 (30.6) | 0.371 |
| Chronic Kidney Disease (%) | 71 (35.1) | 73 (37.1) | 69 (35.0) | 68 (31.7) | 0.783 |
| Heart Failure (%) | 32 (15.9) | 35 (16.4) | 36 (23.2) | 31 (14.4) | 0.282 |
| Coronary Heart Disease (%) | 24 (12.0) | 32 (16.7) | 34 (21.0) | 43 (24.6) | 0.114 |
| Cancer (%) | 39 (28.4) | 31 (18.3) | 40 (20.0) | 34 (14.1) | **0.021** |
| Chronic obstructive pulmonary disease (%) | 21 (15.6) | 22 (12.0) | 36 (24.6) | 30 (17.1) | 0.116 |
| Serum folate, nmol/L | 33.20 [23.28, 60.03] | 34.76 [22.25, 62.03] | 41.87 [23.12, 64.38] | 39.98 [25.47, 61.38] | 0.546 |
| Serum vitamin B12, pmol/L | 363.10 [248.03, 542.70] | 341.95 [275.27, 489.96] | 380.00 [284.82, 519.30] | 381.31 [279.65, 543.82] | 0.477 |
| Homocysteine, μmol/L | 10.31 [8.09, 12.20] | 10.15 [7.49, 13.70] | 10.22 [7.92, 12.56] | 9.84 [8.23, 12.51] | 0.099 |
| Circulating MMA, nmol/L | 179.21 [125.07, 270.00] | 190.00 [129.80, 282.87] | 164.77 [123.46, 279.55] | 180.00 [130.00, 248.00] | 0.734 |
| B12 intake from foods, μg/day | 1.22 [0.72, 1.56] | 2.42 [2.13, 2.88] | 4.24 [3.72, 5.06] | 8.33 [6.55, 10.88] | **<0.001** |
| Metformin use, % | 22 (9.5) | 16 (5.4) | 21 (8.2) | 21 (11.9) | 0.251 |
| Anti-platelet agents, % | 10 (4.5) | 4 (2.6) | 17 (9.3) | 10 (4.5) | 0.143 |
| Anti-lipid agents, % | 82 (48.9) | 64 (33.3) | 64 (36.9) | 65 (33.7) | 0.075 |
| Histamine-2 receptor antagonist, % | 35 (21.5) | 21 (10.1) | 32 (15.0) | 27 (11.8) | 0.083 |
| B12 supplements (%) | 29 (26.4) | 34 (24.9) | 29 (24.9) | 37 (24.4) | 0.991 |
| eGFR, (mL/min/1.73 m2) | 70.97 [54.29, 91.34] | 73.98 [52.18, 90.97] | 75.28 [50.46, 90.81] | 74.07 [57.38, 96.40] | 0.770 |

Continuous variables are presented as mean (SD), median [IQR]. Categorical variables were adjusted for survey weights of NHANES. The observed numbers for categorical variables were unweighted. Bold text indicates a statistically significant difference with a p-value less than 0.05. NHANES = National Health and Nutrition Examination Survey; BMI = body mass index; MMA = methylmalonic acid; eGFR = estimated glomerular filtration rate.

.

Table S7. Partial correlation of methylmalonic acid with stroke biomarkers in NHANES

| **Variables** | **R (Correlation coefficient)** | **Pvalue** |
| --- | --- | --- |
| Age, years | 0.292 | **<0.001** |
| BMI, kg/m2 | -0.085 | 0.020 |
| Waist circumference, cm | -0.014 | 0.718 |
| Diastolic BP, mmHg | -0.115 | **0.001** |
| Systolic BP, mmHg | 0.072 | 0.045 |
| WBC, 109/L | 0.049 | 0.164 |
| Neutrophil Percentage, % | 0.105 | **0.003** |
| Hemoglobin, g/L | -0.177 | **<0.001** |
| MCV, fL | 0.052 | 0.137 |
| CRP, mg/dL | 0.068 | 0.149 |
| Homocysteine, µmol/L | 0.559 | **<0.001** |
| LDL-C, mmol/L | -0.103 | 0.049 |
| Triglyceride, mmol/L | 0.0545 | 0.271 |
| Cholesterol, total, mmol/L | -0.028 | 0.420 |
| HDL-C, mmol/L | -0.044 | 0.214 |
| Creatinine, µmol/L | 0.369 | **<0.001** |
| eGFR, mL/min per1.73m² | -0.500 | **<0.001** |
| Vitamin B12*, pmol/L | -0.245 | **<0.001** |
| Serum folate*, nmol/L | 0.032 | 0.365 |
| HbA1c*, % | -0.025 | 0.478 |
| Glucose, mmol/L* | -0.055 | 0.266 |

Partial correlation coefficients were estimated by the Pearson analysis corrected for age, sex, and race. *Log2 transformation due to skewed distribution; #After Bonferroni correction for 21 tests, P-value ≤ 0.003 was considered significant. BMI = body mass index; BP = blood pressure; WBC = white blood cell count; MCV = Mean Corpuscular Volume; CRP = C-reactive protein; LDL-C = low-density lipoprotein cholesterol; HDL-C = high-density lipoprotein cholesterol; eGFR = estimated glomerular filtration rate.

Table S8. The associations between serum B12 and mortality risk in adults with stroke

| **Mortality** | **Serum vitamin B12 (pmol/L)** | | | | | | **P trend** |
| --- | --- | --- | --- | --- | --- | --- | --- |
| **Log2 B12* (n=820)** | **P value** | **Q1 ≤ 277**  **(n=206)** | **Q2**  **277-378**  **(n=205)** | **Q3 378-531 (n=205)** | **Q4 ＞531**  **(n=204)** |
| **All-cause** |  |  |  |  |  |  |  |
| Deaths/person-yrs | 480/6571 | - | 129/1708 | 121/1751 | 113/1744 | 117/1368 | - |
| Crude | 1.037 (0.880-1.224) | 0.658 | 1.020 (0.745-1.396) | 1.0 (Ref) | 0.990 (0.681-1.439) | 1.121 (0.799-1.575) | 0.700 |
| Model 1 | 1.063 (0.903-1.250) | 0.465 | 0.924 (0.652-1.308) | 1.0 (Ref) | 0.980 (0.658-1.459) | 1.071 (0.751-1.527) | 0.704 |
| Model 2 | 1.078 (0.885-1.314) | 0.454 | 0.816 (0.560-1.191) | 1.0 (Ref) | 1.165 (0.764-1.775) | 0.950 (0.628-1.439) | 0.810 |
| Model 3 | 1.078 (0.884-1.314) | 0.460 | 0.819 (0.559-1.200) | 1.0 (Ref) | 1.148 (0.759-1.736) | 0.953 (0.624-1.455) | 0.825 |
| **Diseases of heart** |  |  |  |  |  |  |  |
| Deaths | 160/6571 |  | 41/1708. | 36/1751 | 41/1744 | 42/1368 |  |
| Crude | 1.123 (0.814-1.551) | 0.479 | 1.248 (0.644-2.419) | 1.0 (Ref) | 1.427 (0.727-2.798) | 1.634 (0.829-3.222) | 0.500 |
| Model 1 | 1.156 (0.837-1.596) | 0.379 | 1.113 (0.543-2.285) | 1.0 (Ref) | 1.427 (0.703-2.896) | 1.574 (0.751-3.299) | 0.161 |
| Model 2 | 1.239 (0.834-1.840) | 0.290 | 1.137 (0.499-2.595) | 1.0 (Ref) | 1.877 (0.810-4.347) | 1.870 (0.765-4.568) | 0.088 |
| Model 3 | 1.227 (0.819-1.839) | 0.321 | 1.164 (0.508-2.670) | 1.0 (Ref) | 1.806 (0.779-4.184) | 1.899 (0.780-4.624) | 0.094 |
| **Malignant neoplasms** |  |  |  |  |  |  |  |
| Deaths/person-yrs | 64/6571 |  | 19/1708 | 19/1751 | 9/1744 | 17/1368 |  |
| Crude | 0.797 (0.515-1.234) | 0.309 | 0.773 (0.333-1.794) | 1.0 (Ref) | 0.344 (0.096-1.233) | 0.614 (0.251-1.502) | 0.211 |
| Model 1 | 0.797 (0.513-1.237) | 0.312 | 0.752 (0.300-1.886) | 1.0 (Ref) | 0.335 (0.087-1.281) | 0.590 (0.227-1.533) | 0.210 |
| Model 2 | 0.932 (0.543-1.599) | 0.798 | 0.463 (0.169-1.271) | 1.0 (Ref) | 0.373 (0.097-1.436) | 0.467 (0.174-1.254) | 0.594 |
| Model 3 | 0.890 (0.506-1.565) | 0.686 | 0.470 (0.174-1.273) | 1.0 (Ref) | 0.367 (0.099-1.358) | 0.451 (0.168-1.210) | 0.533 |
| **Cerebrovascular diseases** |  |  |  |  |  | 1 |  |
| Deaths/person-yrs | 47/6571 |  | 8/1708 | 13/1751 | 14/1744 | 12/1368 | 0.127 |
| Crude | 1.202 (0.881-1.641) | 0.246 | 0.375 (0.135-1.047) | 1.0 (Ref) | 0.715 (0.296-1.729) | 0.815 (0.340-1.955) | 0.295 |
| Model 1 | 1.317 (0.937-1.850) | 0.113 | 0.352 (0.121-1.025) | 1.0 (Ref) | 0.814 (0.322-2.055) | 0.878 (0.356-2.166) | 0.138 |
| Model 2 | 1.262 (0.817-1.950) | 0.294 | 0.378 (0.119-1.199) | 1.0 (Ref) | 1.378 (0.475-3.993) | 0.839 (0.274-2.568) | 0.179 |
| Model 3 | 1.031 (0.670-1.586) | 0.890 | 0.381 (0.119-1.217) | 1.0 (Ref) | 1.502 (0.526-4.289) | 0.542 (0.147-2.003) | 0.294 |

Ref, treating the bottom group as the reference. HR (95%CI) was estimated by weighted Cox regression analyses. Bold text indicates a statistically significant difference with a p-value less than 0.05.

*Hazard ratio per 1 unit increases of natural log2-transformed B12.

Model 1: adjusted for age (≤40, 40-60, 60-80, ≥80), sex (female or male), race/ethnicity (Mexican, Non-Hispanic Black, Non-Hispanic White, Other, Other Hispanic).

Model 2: Based on Model 1, additionally adjusted for education level (<high school, high school or equivalent, or ≥college), marital status (married/living with partner, never married, widowed/divorced/separated), family income-to-poverty ratio (<1, 1-1.99, 2-3.99, ≥4), BMI (<25.0, 25.0-29.9, or ≥30.0), smoking status (never, former, or current), alcohol consumption (heavy drinker, light to moderate drinker, or non-drinker), hypertension (no/yes), hyperlipidemia (no/yes), diabetes (no/yes), CKD (no/yes), CHD (no/yes), chronic obstructive pulmonary disease (no/yes), and cancer (no/yes).

Model 3: Based on Model 2, additionally adjusted for the use of cerebrovascular medications, including metformin (no/yes), antiplatelet drugs (no/yes), lipid-lowering drugs (no/yes), and acid-suppressing drugs (no/yes).

Table S9. The associations between dietary B12 intakes from foods and mortality risk in adults with stroke

|  | **Dietary B12 intakes from foods, mcg/day** | | | | | | **P trend** |
| --- | --- | --- | --- | --- | --- | --- | --- |
| **Mortality** | **Increase per 5mcg/d**  **(n= 758)** | **p value** | **Q1 <=1.8 (n=183)** | **Q2 1.81-3.24**  **(n=188)** | **Q3 3.24-5.79 (n=192)** | **Q4 >5.79 (n=195)** |  |
| **All-cause** |  |  |  |  |  |  |  |
| Deaths/person-yrs | 440/6182 |  | 101/1495 | 111/1603 | 116/1501 | 112/1613 |  |
| Crude | 0.972 (0.858-1.102) | 0.658 | 1.0 (Ref) | 0.720 (0.486-1.066) | 0.873 (0.602-1.266) | 0.747 (0.534-1.045) | 0.240 |
| Model 1 | 1.045 (0.926-1.178) | 0.476 | 1.0 (Ref) | 0.794 (0.547-1.151) | 0.989 (0.704-1.388) | 0.916 (0.649-1.294) | 0.977 |
| Model 2 | 1.048 (0.912-1.204) | 0.510 | 1.0 (Ref) | 0.761 (0.513-1.127) | 0.869 (0.592-1.275) | 0.849 (0.602-1.197) | 0.553 |
| Model 3 | 1.037 (0.898-1.198) | 0.620 | 1.0 (Ref) | 0.728 (0.485-1.092) | 0.865 (0.586-1.276) | 0.803 (0.561-1.150) | 0.437 |
| **Diseases of heart** |  |  |  |  |  |  |  |
| Deaths | 151/6182 |  | 29/1465 | 40/1603 | 47/1501 | 35/1613 |  |
| Crude | 0.771 (0.612-0.971) | 0.027 | 1.0 (Ref) | 0.642 (0.315-1.309) | 1.057 (0.544-2.054) | 0.598 (0.328-1.088) | 0.261 |
| Model 1 | 0.879 (0.689-1.121) | 0.297 | 1.0 (Ref) | 0.705 (0.363-1.371) | 1.206 (0.657-2.215) | 0.761 (0.410-1.410) | 0.795 |
| Model 2 | 0.800 (0.582-1.099) | 0.169 | 1.0 (Ref) | 0.831 (0.374-1.844) | 1.213 (0.552-2.667) | 0.682 (0.330-1.409) | 0.456 |
| Model 3 | 0.793 (0.579-1.086) | 0.148 | 1.0 (Ref) | 0.833 (0.361-1.924) | 1.444 (0.667-3.126) | 0.671 (0.315-1.430) | 0.007 |
| **Malignant neoplasms** |  |  |  |  |  |  |  |
| Deaths/person-yrs | 56/6182 |  | 11/1465 | 15/1603 | 11/1501 | 19/1613 |  |
| Crude | 0.899 (0.645-1.253) | 0.529 | 1.0 (Ref) | 0.968 (0.341-2.749) | 0.515 (0.179-1.482) | 0.942 (0.371-2.394) | 0.728 |
| Model 1 | 0.913 (0.661-1.261) | 0.581 | 1.0 (Ref) | 1.000 (0.344-2.908) | 0.531 (0.183-1.538) | 0.984 (0.375-2.581) | 0.790 |
| Model 2 | 1.026 (0.763-1.379) | 0.867 | 1.0 (Ref) | 0.953 (0.302-3.004) | 0.539 (0.159-1.825) | 1.252 (0.465-3.368) | 0.738 |
| Model 3 | 1.002 (0.739-1.358) | 0.991 | 1.0 (Ref) | 0.928 (0.294-2.929) | 0.605 (0.1381-2.653) | 1.202 (0.429-3.369) | 0.752 |
| **Cerebrovascular diseases** |  |  |  |  |  |  |  |
| Deaths/person-yrs | 40/6182 |  | 10/1465 | 8/1603 | 12/1501 | 10/1613 |  |
| Crude | 1.199 (0.868-1.656) | 0.272 | 1.0 (Ref) | 0.897 (0.315-2.552) | 1.047 (0.377-2.903) | 0.917 (0.357-2.355) | 0.947 |
| Model 1 | 1.260 (0.934-1.701) | 0.131 | 1.0 (Ref) | 0.994 (0.374-2.643) | 1.198 (0.425-3.379) | 1.154 (0.444-3.001) | 0.722 |
| Model 2 | 1.311 (1.052-1.633) | 0.025 | 1.0 (Ref) | 0.362 (0.090-1.462) | 0.837 (0.216-3.217) | 0.991 (0.321-3.060) | 0.657 |
| Model 3 | 1.287 (1.025-1.614) | 0.030 | 1.0 (Ref) | 0.392(0.101-1.563) | 0.768 (0.190-3.106) | 0.988 (0.327-2.989) | 0.670 |

Ref, treating the bottom group as the reference. HR (95%CI) was estimated by weighted Cox regression analyses. Bold text indicates a statistically significant difference with a p-value less than 0.05.

Model 1: adjusted for age (≤40, 40-60, 60-80, ≥80), sex (female or male), race/ethnicity (Mexican, Non-Hispanic Black, Non-Hispanic White, Other, Other Hispanic).

Model 2: Based on Model 1, additionally adjusted for education level (<high school, high school or equivalent, or ≥college), marital status (married/living with partner, never married, widowed/divorced/separated), family income-to-poverty ratio (<1, 1-1.99, 2-3.99, ≥4), BMI (<25.0, 25.0-29.9, or ≥30.0), smoking status (never, former, or current), alcohol consumption (heavy drinker, light to moderate drinker, or non-drinker), hypertension (no/yes), hyperlipidemia (no/yes), diabetes (no/yes), CKD (no/yes), CHD (no/yes), chronic obstructive pulmonary disease (no/yes), and cancer (no/yes).

Model 3: Based on Model 2, additionally adjusted for the use of cerebrovascular medications, including metformin (no/yes), antiplatelet drugs (no/yes), lipid-lowering drugs (no/yes), and acid-suppressing drugs (no/yes).

Table S10. The associations between B12 supplements and mortality risk in adults with stroke

|  | **B12 supplements** | | |
| --- | --- | --- | --- |
| **Mortality** | **NO-use (n=511)** | **Use (n=141)** | **P value** |
| **All-cause** |  |  |  |
| Deaths/person-yrs | 289/4075 | 63/812 |  |
| Crude | 1.0 (Ref) | 1.029 (0.654-1.619) | 0.902 |
| Model 1 | 1.0 (Ref) | 1.123 (0.741-1.704) | 0.584 |
| Model 2 | 1.0 (Ref) | 1.283 (0.840-1.960) | 0.249 |
| Model 3 | 1.0 (Ref) | 1.240 (0.791-1.944) | 0.348 |
| **Diseases of heart** |  |  |  |
| Deaths/person-yrs | 93/4075 | 18/812 |  |
| Crude | 1.0 (Ref) | 0.808 (0.360-1.813) | 0.604 |
| Model 1 | 1.0 (Ref) | 0.930 (0.405-2.133) | 0.864 |
| Model 2 | 1.0 (Ref) | 0.997 (0.391-2.539) | 0.994 |
| Model 3 | 1.0 (Ref) | 1.251 (0.526-2.974) | 0.612 |
| **Malignant neoplasms** |  |  |  |
| Deaths/person-yrs | 289/4075 | 7/812 |  |
| Crude | 1.0 (Ref) | 0.565 (0.228-1.401) | 0.218 |
| Model 1 | 1.0 (Ref) | 0.568 (0.235-1.372) | 0.209 |
| Model 2 | 1.0 (Ref) | 0.856 (0.330-2.221) | 0.749 |
| Model 3 | 1.0 (Ref) | 0.713 (0.262-1.939) | 0.508 |
| **Cerebrovascular diseases** |  |  |  |
| Deaths/person-yrs | 48/4075 | 9/812 |  |
| Crude | 1.0 (Ref) | 1.636 (0.632-4.237) | 0.310 |
| Model 1 | 1.0 (Ref) | 2.099 (0.801-5.506) | 0.132 |
| Model 2 | 1.0 (Ref) | 2.353 (0.733-7.558) | 0.151 |
| Model 3 | 1.0 (Ref) | 2.508 (0.511-10.231) | 0.257 |

Ref, treating the bottom group as the reference. HR (95%CI) was estimated by weighted Cox regression analyses. Bold text indicates a statistically significant difference with a p-value less than 0.05.

Model 1: adjusted for age (≤40, 40-60, 60-80, ≥80), sex (female or male), race/ethnicity (Mexican, Non-Hispanic Black, Non-Hispanic White, Other, Other Hispanic).

Model 2: Based on Model 1, additionally adjusted for education level (<high school, high school or equivalent, or ≥college), marital status (married/living with partner, never married, widowed/divorced/separated), family income-to-poverty ratio (<1, 1-1.99, 2-3.99, ≥4), BMI (<25.0, 25.0-29.9, or ≥30.0), smoking status (never, former, or current), alcohol consumption (heavy drinker, light to moderate drinker, or non-drinker), hypertension (no/yes), hyperlipidemia (no/yes), diabetes (no/yes), CKD (no/yes), CHD (no/yes), chronic obstructive pulmonary disease (no/yes), and cancer (no/yes).

Model 3: Based on Model 2, additionally adjusted for the use of cerebrovascular medications, including metformin (no/yes), antiplatelet drugs (no/yes), lipid-lowering drugs (no/yes), and acid-suppressing drugs (no/yes).

Table S11. The associations of all-cause mortality with B12 or MMA in patients with stroke after excluding subjects with <2-year follow-up

|  | **Deaths/**  **person-yrs** | **Crude** | | **Model 1** | | **Model 2** | | **Model 3** | |
| --- | --- | --- | --- | --- | --- | --- | --- | --- | --- |
| **HR (95%CI)** | **P value** | **HR (95%CI)** | **P value** | **HR (95%CI)** | **P value** | **HR (95%CI)** | **P value** |
| **Vitamin B12** |  |  |  |  |  |  |  |  |  |
| Log2 B12 | 403/6484 | 0.968(0.811-1.156) | 0.723 | 0.993 (0.831-1.687) | 0.942 | 0.969 (0.785-1.195) | 0.765 | 0.968 (0.784-1.194) | 0.759 |
| Q1 (n=192) | 115/1694 | 0.992 (0.717-1.372) |  | 0.910 (0.614-1.348) |  | 0.865 (0.562-1.332) |  | 0.860 (0.559-1.324) |  |
| Q2 (n=190) | 106/1731 | 1.0 (Ref) |  | 1.0 (Ref) |  | 1.0 (Ref) |  | 1.0 (Ref) |  |
| Q3 (n=183) | 91/1720 | 0.861 (0.569-1.303) |  | 0.863 (0.548-1.358) |  | 0.872 (0.569-1.338) |  | 0.869 (0.573-1.319) |  |
| Q4 (n=178) | 91/1339 | 1.063 (0.738-1.531) | 0.997# | 1.006 (0.668-1.517) | 0.789# | 0.877 (0.557-1.383) | 0.925# | 0.880 (0.551-1.406) | 0.825# |
| **Circulating MMA** |  |  |  |  |  |  |  |  |  |
| Log2 MMA | 403/6485 | 1.663 (1.445-1.914) | **<0.001** | 1.479 (1.251-1.740) | **<0.001** | 1.378 (1.155-1.643) | <0.001 | 1.374 (1.161-1.626) | **<0.001** |
| Q1 (n=215) | 85/2203 | 1.0 (Ref) |  | 1.0 (Ref) |  | 1.0 (Ref) |  | 1.0 (Ref) |  |
| Q2 (n=184) | 96/1707 | 1.858 (1.342-2.574) |  | 1.442 (1.023-2.031) |  | 1.375 (0.929-2.036) |  | 1.360 (0.916-2.022) |  |
| Q3 (n=167) | 98/1387 | 2.364 (1.702-3.283) |  | 1.555 (1.126-2.147) |  | 1.360 (0.871-2.125) |  | 1.356 (0.887-2.073) |  |
| Q4 (n=177) | 124/1188 | 3.863 (2.702-5.523) | **<0.001**# | 2.633 (1.751-3.959) | **<0.001**# | 2.239 (1.425-3.517) | **0.001**# | 2.227 (1.430-3.470) | **<0.001**# |
| **Dietary B12 intakes from foods** |  |  |  |  |  |  |  |  |  |
| Increase per 5mcg/d | 374/6105 | 0.990 (0.863-1.137) | 0.889 | 1.045 (0.910-1.199) | 0.536 | 1.031 (0.874-1.216) | 0.715 | 1.017 (0.856-1.210) | 0.846 |
| Q1 (n=169) | 87/1448 | 1.0 (Ref) |  | 1.0 (Ref) |  | 1.0 (Ref) |  | 1.0 (Ref) |  |
| Q2 (n=170) | 93/1582 | 0.685 (0.444-1.056) |  | 0.742 (0.481-1.146) |  | 0.710 (0.467-1.082) |  | 0.660 (0.426-1.023) |  |
| Q3 (n=171) | 95/1478 | 0.790 (0.543-1.149) |  | 0.887 (0.613-1.284) |  | 0.832(0.559-1.237) |  | 0.794 (0.527-1.196) |  |
| Q4 (n=182) | 99/1597 | 0.733 (0.516-1.041) | 0.211# | 0.828 (0.554-1.236) | 0.617# | 0.760 (0.519 -1.115) | 0.305# | 0.692 (0.470-1.170) | 0.163# |
| **B12 supplement** |  |  |  |  |  |  |  |  |  |
| Users vs. Nonusers | 46/796 vs 246/4024 | 1.013 (0.605-1.695) | 0.962 | 1.053 (0.653-1.698) | 0.832 | 1.052 (0.656-1.688) | 0.833 | 1.052 (0.629-1.761) | 0.846 |

# P for trend across the tertiles of B12 or MMA. HR (95%CI) was estimated by weighted Cox regression analyses.

Ref, treating the bottom group as the reference. Bold text indicates a statistically significant difference with a p-value less than 0.05.

Model 1: adjusted for age (≤40, 40-60, 60-80, ≥80), sex (female or male), race/ethnicity (Mexican, Non-Hispanic Black, Non-Hispanic White, Other, Other Hispanic).

Model 2: Based on Model 1, additionally adjusted for education level (<high school, high school or equivalent, or ≥college), marital status (married/living with partner, never married, widowed/divorced/separated), family income-to-poverty ratio (<1, 1-1.99, 2-3.99, ≥4), BMI (<25.0, 25.0-29.9, or ≥30.0), smoking status (never, former, or current), alcohol consumption (heavy drinker, light to moderate drinker, or non-drinker), hypertension (no/yes), hyperlipidemia (no/yes), diabetes (no/yes), CKD (no/yes), CHD (no/yes), chronic obstructive pulmonary disease (no/yes), and cancer (no/yes).

Model 3: Based on Model 2, additionally adjusted for the use of cerebrovascular medications, including metformin (no/yes), antiplatelet drugs (no/yes), lipid-lowering drugs (no/yes), and acid-suppressing drugs (no/yes).

Table S12. HRs (95% CI) of mortality according to serum vitamin B12 and circulating MMA levels among stroke patients with further adjustment of several biomarkers and dietary factors

|  |  | **Serum vitamin B12 (pmol/L)** | | | **Circulating MMA (nmol/L)** | | | |
| --- | --- | --- | --- | --- | --- | --- | --- | --- |
|  | **Q1 ≤ 277** | **Q2**  **277-378** | **Q3 378-531** | **Q4 ＞531** | **Q1 <=130** | **Q2 130-180** | **Q3 180-268** | **Q4** **>268** |
| Deaths/person-yrs | 129/1708 | 121/1751 | 113/1744 | 117/1368 | 91/2209 | 108/1722 | 129/1423 | 152/1218 |
| Model 1 | 0.819 (0.559-1.200) | 1.0 (Ref) | 1.148 (0.759-1.736) | 0.953 (0.624-1.455) | 1.0 (Ref) | 1.471 (1.034-2.094) | 1.647 (1.123-2.416) | 2.277 (1.512-3.430) |
| Model 2 | 0.787 (0.534-1.160) | 1.0 (Ref) | 1.048 (0.700-1.570) | 0.876 (0.575-1.334) | 1.0 (Ref) | 1.305 (0.886-1.923) | 1.430 (0.952-2.148) | 2.101 (1.394-3.168) |
| Model 3 | 0.788 (0.529-1.172) | 1.0 (Ref) | 1.262 (0.838-1.900) | 1.067 (0.702-1.622) | 1.0 (Ref) | 1.443 (1.007-2.068) | 1.703 (1.167-2.484) | 2.417 (1.610-3.628) |
| Model 4 | 0.784 (0.513-1.196) | 1.0 (Ref) | 1.037 (0.623-1.727) | 0.794 (0.455-1.386) | 1.0 (Ref) | 1.471 (0.946-2.286) | 1.679 (1.080-2.612) | 2.420 (1.566-3.742) |
| Model 5 | 0.834 (0.570-1.220) | 1.0 (Ref) | 1.189 (0.792-1.783) | 0.975 (0.639-1.478) | 1.0 (Ref) | 1.425 (1.004-2.203) | 1.621 (1.108-2.373) | 2.193 (1.450-3.317) |
| Model 6 | 0.819 (0.556-1.205) | 1.0 (Ref) | 1.159 (0.765-1.715) | 0.954 (0.628-1.447) | 1.0 (Ref) | 1.210 (1.489-2.742) | 1.652 (1.112-2.443) | 2.265 (1.482-3.550) |
| Model 7 | 0.673 (0.440-1.028) | 1.0 (Ref) | 1.139 (0.687-1.889) | 0.905 (0.531-1.543) | 1.0 (Ref) | 1.370 (0.888-2.112) | 1.548 (0.998-2.401) | 2.021 (1.258-3.249) |
| Model 8 | 0.848 (0.573-1.254) | 1.0 (Ref) | 1.182 (0.772-1.811) | 0.962 (0.627-1.478) | 1.0 (Ref) | 1.423 (0.979-2.069) | 1.537 (1.021-2.314) | 2.078 (1.328-3.461) |
| Model 9 | 0.877 (0.554-1.207) | 1.0 (Ref) | 1.125 (0.739-1.713) | 0.878 (0.557-1.383) | 1.0 (Ref) | 1.504 (1.052-2.151) | 1.663 (1.135-2.438) | 2.362 (1.564-3.567) |
| Model 10 | 0.843 (0.559-1.273) | 1.0 (Ref) | 1.183 (0.762-1.838) | 0.906 (0.581-1.413) | 1.0 (Ref) | 1.409 (0.955-2.078) | 1.561 (1.009-2.415) | 2.169 (1.394-3.373) |
| Model 11 | 0861 (0.538-1.377) | 1.0 (Ref) | 1.104 (0.739-1.897) | 0.960 (0.588-1.568) | 1.0 (Ref) | 1.743 (1.208-2.515) | 1.816 (1.161-2.838) | 2.452 (1.502-3.916) |
| Model 12 | 0.754 (0.480-1.184) | 1.0 (Ref) | 1.275 (0.812-2.002) | 1.133 (0.731-1.755) | 1.0 (Ref) | 1.332 (0.812-2.185) | 1.537 (0.910-2.594) | 2.146 (1.212-3.785) |
| Model 13 | 1.163 (0.750-1.806) | 1.0 (Ref) | 1.152 (0.722-1.838) | 0.993 (0.584-1.688) | 1.0 (Ref) | 1.506 (0.992-2.285) | 1.807 (1.151-2.837) | 2.689 (0.743-4.150) |
| Model 14 | 0.708 (0.436-1.150) | 1.0 (Ref) | 0.838 (0.513-1.150) | 0.598 (0.345-1.036) | 1.0 (Ref) | 1.315 (0.847-2.042) | 1.630 (1.017-2.613) | 1.909 (1.149-3.172) |

Model 1: adjusted for age (≤40, 40-60, 60-80, ≥80), sex (female or male), race/ethnicity (Mexican, Non-Hispanic Black, Non-Hispanic White, Other, Other Hispanic), education level (<high school, high school or equivalent, or ≥college), marital status (married/living with partner, never married, widowed/divorced/separated), family income-to-poverty ratio (<1, 1-1.99, 2-3.99, ≥4), BMI (<25.0, 25.0-29.9, or ≥30.0), smoking status (never, former, or current), alcohol consumption (heavy drinker, light to moderate drinker, or non-drinker), hypertension (no/yes), hyperlipidemia (no/yes), diabetes (no/yes), CKD (no/yes), CHD (no/yes), chronic obstructive pulmonary disease (no/yes), and cancer (no/yes), metformin (no/yes), antiplatelet drugs (no/yes), lipid-lowering drugs (no/yes), and acid-suppressing drugs (no/yes).

Model 2: Recalculate based on Model 1 by treating age as a continuous variable.

Model 3: Model 1 + mutually adjustment of serum vitamin B12 and circulating MMA.

Model 4: Model 1 + CRP.

Model 5: Model 1 + WBC + neutrophil percentage.

Model 6: Model 1 + triglycerides, LDL, and HDL.

Model 7: Model 1 + homocysteine.

Model 8: Model 1 + eGFR.

Model 9: Model 1 + vitamin B12 supplements.

Model 10: Model 1 + dietary vitamin B12 intake.

Model 11: further excluded participants who had CHD and HF history at baseline based on Model 1.

Model 12: further excluded participants who had DM history at baseline based on Model 1.

Model 13: further excluded participants who had cancer history at baseline based on Model 1.

Model 14: further excluded participants who had CKD history at baseline based on Model 1.


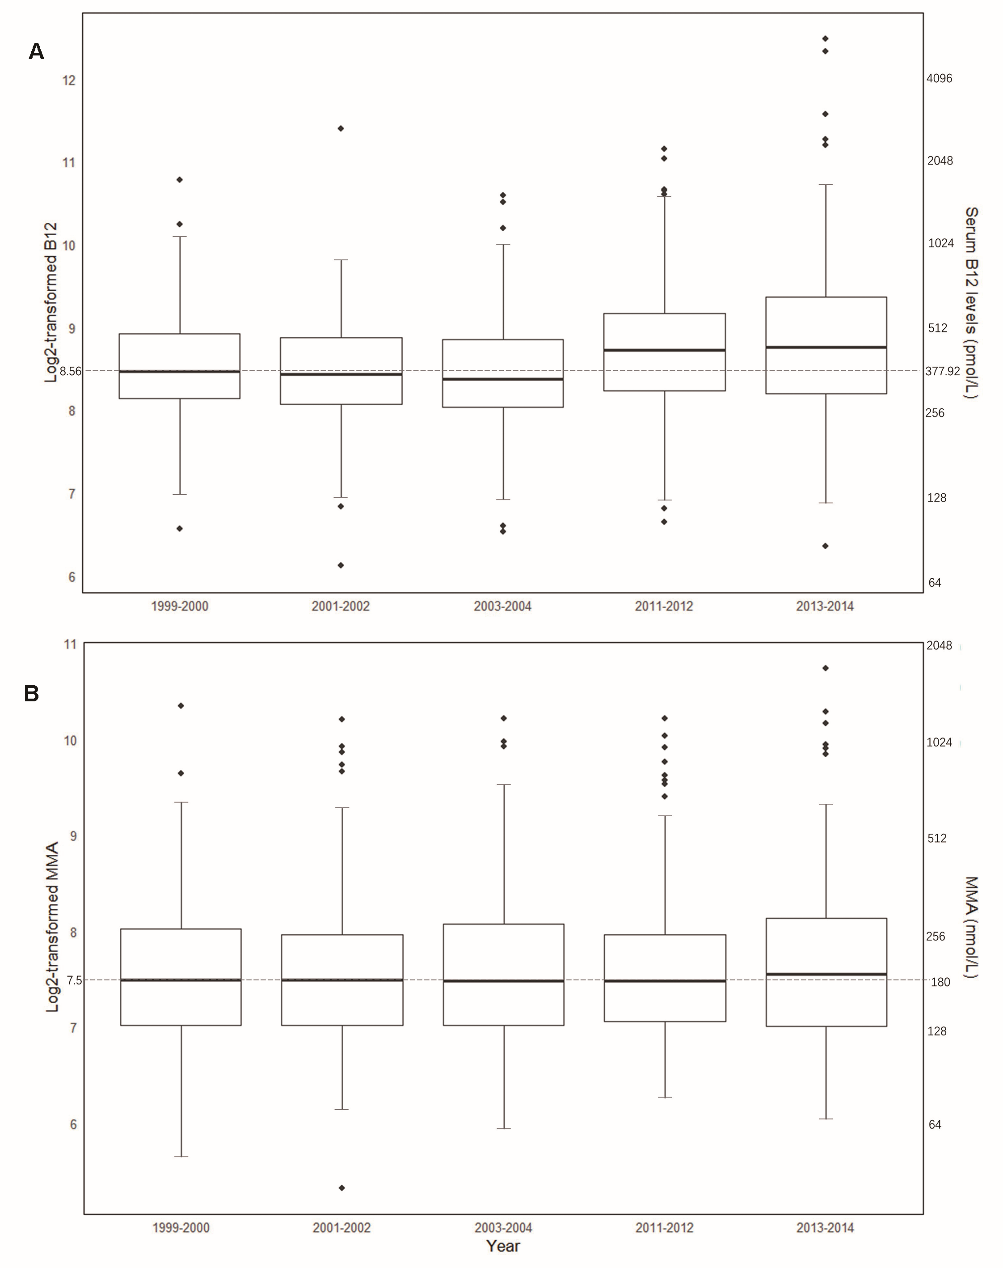


Figure S1. Box plots of serum vitamin B12 (A) and circulating methylmalonic acid (B) in each survey cycle

Left Y-axis represents the log2 transformed levels of serum vitamin B12 and circulating methylmalonic acid, while the right Y-axis marks the corresponding levels of serum vitamin B12 (pmol/L) and methylmalonic acid (nmol/L).


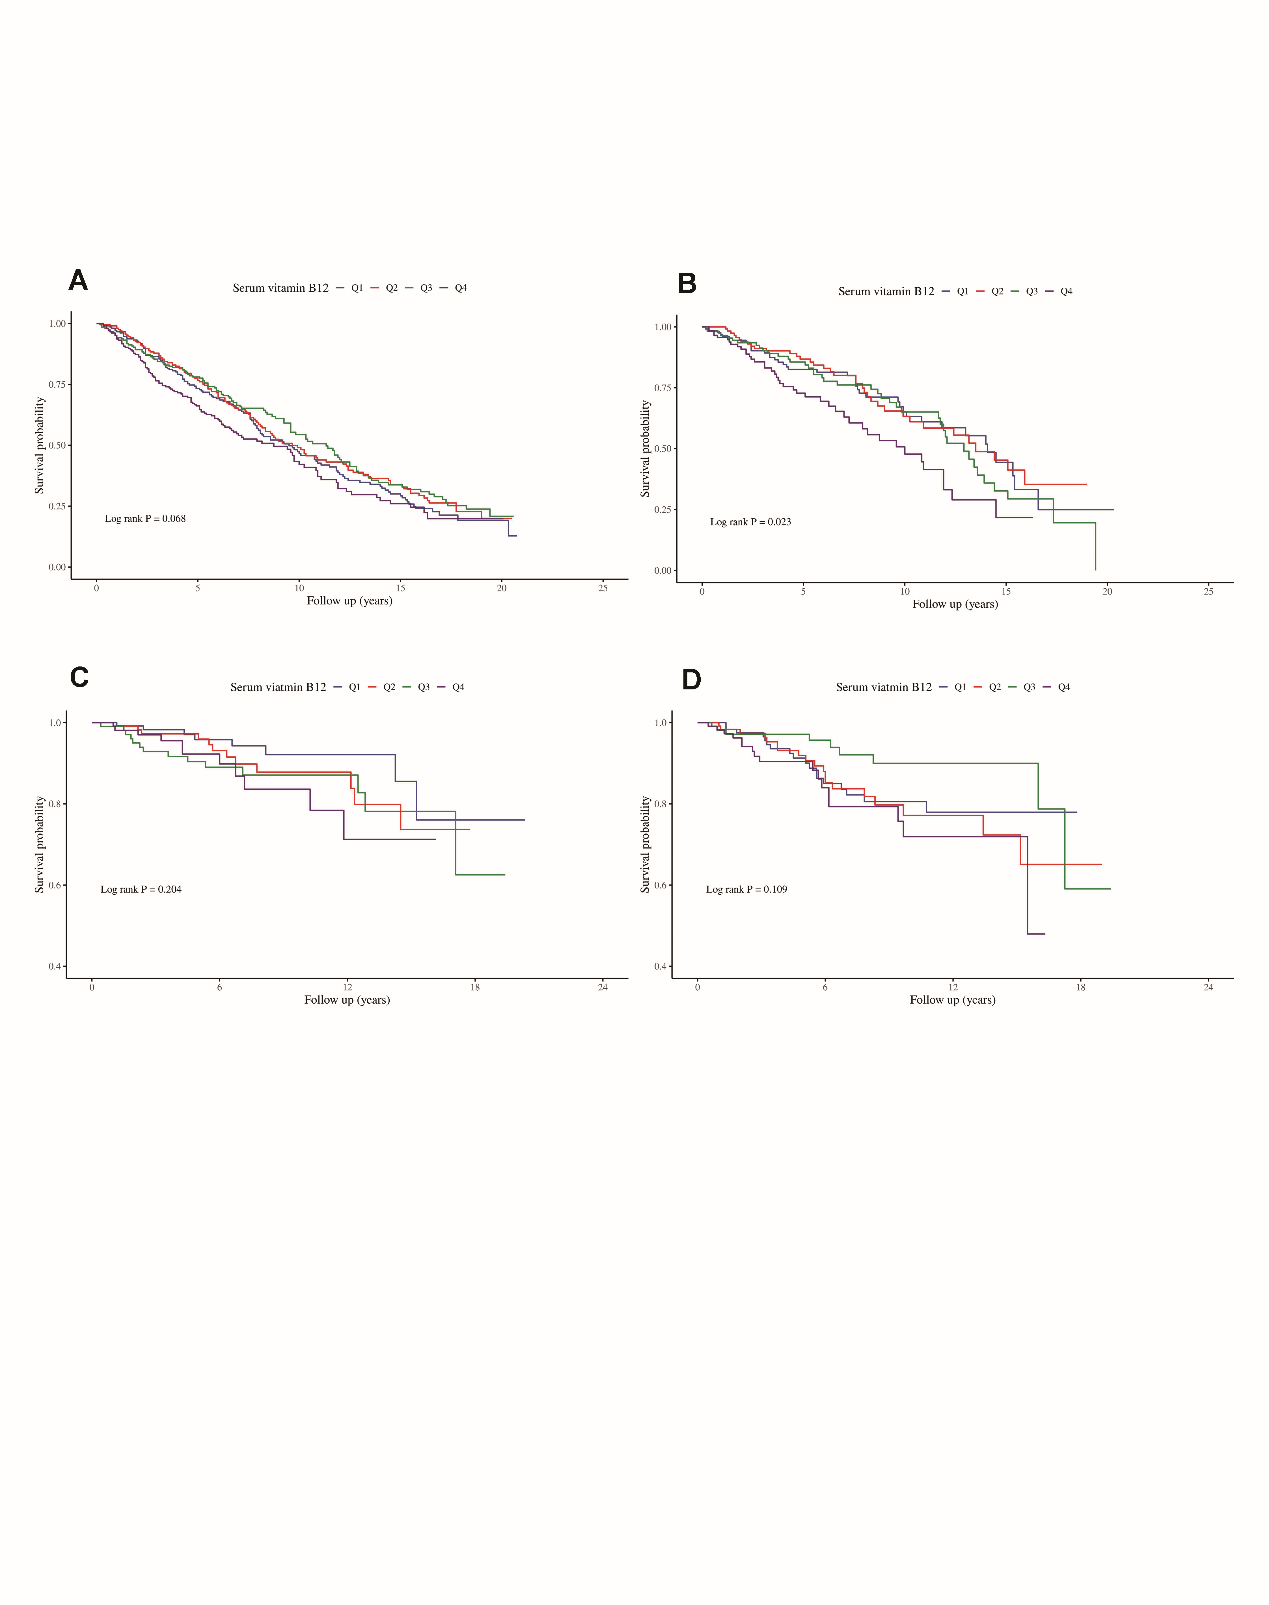


Figure S2. Kaplan-Meier curves for (A) all-cause mortality, (B) cardiovascular mortality, (C) cancer mortality, (D) Cerebrovascular disease mortality, stratified by baseline serum vitamin B12 levels. Y-axis shows the absolute risk of survival probability (%) estimated by survey-weighted Kaplan-Meier. X-axis shows the follow-up period (years).

1. [1] S.Y. Shin, E.B. Fauman, A.K. Petersen, J. Krumsiek, R. Santos, J. Huang, M. Arnold, I. Erte, V. Forgetta, T.P. Yang, K. Walter, C. Menni, L. Chen, L. Vasquez, A.M. Valdes, C.L. Hyde, V. Wang, D. Ziemek, P. Roberts, L. Xi, E. Grundberg, M. Waldenberger, J.B. Richards, R.P. Mohney, M.V. Milburn, S.L. John, J. Trimmer, F.J. Theis, J.P. Overington, K. Suhre, M.J. Brosnan, C. Gieger, G. Kastenmüller, T.D. Spector, N. Soranzo, An atlas of genetic influences on human blood metabolites, Nat Genet 46(6) (2014) 543-550.
2. [2] S.A.E. Peters, P. Muntner, M. Woodward, Sex Differences in the Prevalence of, and Trends in, Cardiovascular Risk Factors, Treatment, and Control in the United States, 2001 to 2016, Circulation 139(8) (2019) 1025-1035.
